# Supplementary material for: Early cerebrospinal fluid elevations of pTau-217 in severe traumatic brain injury subjects
Source: Frontiers journal article supplement (doi:10.3389/fneur.2025.1632679), 2025-07-30
Supplement: Table_1.xlsx [file Table_1.xlsx]

## Sheet: Table S1
Supplementary Table 1. Number of sTBI patient CSF samples collected at each post-injury time interval in this study. This table shows the number of patients (out of 26) with CSF available at each time point. Due to clinical considerations (e.g., EVD duration, survival), the sample size decreases at later time points.
Time post-injury (hours)	Number of TBI patients with CSF sample (n)
6 h post-injury	18
12 h post-injury	20
18 h post-injury	21
24 h post-injury 26	20
48 h post-injury 24	20
72 h post-injury 22	15
96 h post-injury 20	13
120 h post-injury 18	17
144 h post-injury 15	17
168 h post-injury 14	14
192 h post-injury 12	10
216 h post-injury 10	10
240 h post-injury 8	8
